# Supplementary material for: Associations of within-individual changes in working conditions, health behaviour and BMI with work ability and self-rated health: a fixed effects analysis among Dutch workers
Source: PubMed Central journal article supplement — BMJ Open. 2022 Apr 28;12(4):e058574. doi: 10.1136/bmjopen-2021-058574 (PMC9058761; doi:10.1136/bmjopen-2021-058574), 2022-04-28
Supplement: bmjopen-2021-058574supp001.pdf [file bmjopen-2021-058574supp001.pdf]

## SUPPLEMENTARY MATERIAL

**Table S1.** Percentage of within-individual improvements and within-individual deteriorations in outcomes and predictors for all persons included in the fixed effects analysis (N=14,159) and persons with changes of at least 1 standard deviation.

|                                  | Within-individual improvements |              | Within-individual deteriorations |              |
|----------------------------------|--------------------------------|--------------|----------------------------------|--------------|
|                                  | %                              |              | %                                |              |
| <b>Outcome measures</b>          | <b>All</b>                     | <b>≥1 SD</b> | <b>All</b>                       | <b>≥1 SD</b> |
| Work ability (0-10)              | 40%                            | 31%          | 41%                              | 32%          |
| Self-rated health (1-5)          | 33%                            | 32%          | 34%                              | 33%          |
|                                  |                                |              |                                  |              |
| <b>Working conditions</b>        |                                |              |                                  |              |
| Psychological job demands (1-5)  | 45%                            | 32%          | 45%                              | 31%          |
| Emotional job demands (1-5)      | 44%                            | 34%          | 43%                              | 34%          |
| Autonomy (1-5)                   | 45%                            | 32%          | 46%                              | 32%          |
| Social support (1-5)             | 45%                            | 32%          | 47%                              | 33%          |
| Physical workload (1-5)          | 43%                            | 31%          | 44%                              | 32%          |
|                                  |                                |              |                                  |              |
| <b>Health behaviours and BMI</b> |                                |              |                                  |              |
| Moderate physical activity (0-7) | 43%                            | 34%          | 42%                              | 33%          |
| Vigorous physical activity (0-7) | 42%                            | 34%          | 42%                              | 34%          |
| Smoking (%yes)                   | 29%                            | n/a          | 29%                              | n/a          |
| BMI (kg/m <sup>2</sup> )         | 46%                            | 31%          | 52%                              | 32%          |

SD standard deviation.

**Table S2.** Baseline sociodemographic characteristics of persons included in the fixed effects analysis (N=14,159) and persons not included in the fixed effects analysis (N=7,697).

|                   | Fixed effects analysis    | Not included in fixed effects analysis |
|-------------------|---------------------------|----------------------------------------|
| Age               | 51.1 years old (SD 6.4) * | 52.3 years old (SD=7.6)                |
| Gender (male)     | 54.1%**                   | 48.3%                                  |
| Educational level |                           |                                        |
| Low               | 26.1%                     | 34.3%                                  |
| Intermediate      | 39.5%                     | 37.4%                                  |
| High              | 34.4%**                   | 28.2%                                  |

SD standard deviation.

\*Independent sample t-test, p<0.05.

\*\*Chi-square, p<0.05.

**Table S3.** Sensitivity analysis of the effects of within-individual **improvements** ( $\geq$ SD of differences scores) in working conditions, health behaviours and BMI in a given year on changes in work ability and self-rated health in the same year among employed individuals aged 45–63 years.

|                                              | Change in self-reported work ability (0-10) |                            | Change in self-rated health (1-5) |                            |
|----------------------------------------------|---------------------------------------------|----------------------------|-----------------------------------|----------------------------|
|                                              | N <sup>a</sup>                              | b (95% CI)                 | N <sup>a</sup>                    | b (95% CI)                 |
| <b>Working conditions</b>                    |                                             |                            |                                   |                            |
| Decrease of psychological job demands (1-5)  | 4787                                        | <b>0.05</b> (0.00;0.10)    | 4792                              | 0.02 (-0.00;0.04)          |
| Decrease of emotional job demands (1-5)      | 7579                                        | <b>0.07</b> (0.03;0.11)    | 7580                              | <b>0.03</b> (0.02;0.05)    |
| Increase of autonomy (1-5)                   | 4964                                        | <b>0.09</b> (0.04;0.14)    | 4969                              | <b>0.03</b> (0.01;0.06)    |
| Increase of social support (1-5)             | 5726                                        | <b>0.07</b> (0.03;0.11)    | 5733                              | <b>0.02</b> (0.00;0.03)    |
| Decrease of physical workload (1-5)          | 3771                                        | <b>0.16</b> (0.09;0.22)    | 3776                              | <b>0.05</b> (0.03;0.08)    |
| <b>Health behaviours and BMI</b>             |                                             |                            |                                   |                            |
| Increase in moderate physical activity (0-7) | 6972                                        | -0.01 (-0.03;0.00)         | 6979                              | 0.00 (-0.00;0.01)          |
| Increase vigorous physical activity (0-7)    | 7186                                        | -0.01 (-0.02;0.00)         | 7192                              | <b>0.01</b> (0.00;0.01)    |
| Stop smoking (1=yes, 0=no)                   | 1002                                        | <b>-0.40</b> (-0.53;-0.26) | 1000                              | <b>-0.13</b> (-0.17;-0.08) |
| Decrease in BMI (kg/m <sup>2</sup> )         | 2753                                        | 0.00 (-0.01;0.02)          | 2759                              | <b>0.03</b> (0.02;0.03)    |

Bold: estimate is statistically significant at the 0.05 level

<sup>a</sup> N=number of observations. Individuals may be included in the analyses several times since they could experience multiple improvements in working conditions and healthy behaviour during follow-up.

**Table S4.** Sensitivity analysis of the effects of within-individual **deteriorations** ( $\geq$ SD of differences scores) in working conditions, health behaviours and BMI in a given year on changes in work ability and self-rated health in the same year among employed individuals aged 45–63 years.

|                                              | Change in self-reported work ability (0-10) |                            | Change in self-rated health (1-5) |                            |
|----------------------------------------------|---------------------------------------------|----------------------------|-----------------------------------|----------------------------|
|                                              | N <sup>a</sup>                              | b (95% CI)                 | N <sup>a</sup>                    | b (95% CI)                 |
| <b>Working conditions</b>                    |                                             |                            |                                   |                            |
| Increase of psychological job demands (1-5)  | 4766                                        | <b>-0.22</b> (-0.27;-0.17) | 4773                              | <b>-0.06</b> (-0.08;-0.05) |
| Increase of emotional job demands (1-5)      | 7295                                        | <b>-0.23</b> (-0.27;-0.19) | 7302                              | <b>-0.08</b> (-0.09;-0.06) |
| Decrease of autonomy (1-5)                   | 5276                                        | <b>-0.24</b> (-0.30;-0.19) | 5280                              | <b>-0.09</b> (-0.11;-0.07) |
| Decrease of social support (1-5)             | 6165                                        | <b>-0.20</b> (-0.24;-0.17) | 6172                              | <b>-0.07</b> (-0.09;-0.06) |
| Increase of physical workload (1-5)          | 3806                                        | <b>-0.23</b> (-0.30;-0.17) | 3811                              | <b>-0.09</b> (-0.11;-0.06) |
| <b>Health behaviours and BMI</b>             |                                             |                            |                                   |                            |
| Decrease in moderate physical activity (0-7) | 6625                                        | <b>-0.04</b> (-0.05;-0.02) | 6632                              | <b>-0.02</b> (-0.03;-0.02) |
| Decrease in vigorous physical activity (0-7) | 6788                                        | <b>-0.03</b> (-0.04;-0.02) | 6790                              | <b>-0.02</b> (-0.03;-0.02) |
| Start smoking (1=yes, 0=no)                  | 599                                         | -0.05 (-0.21;0.11)         | 597                               | 0.02 (-0.04;0.08)          |
| Increase in BMI (kg/m <sup>2</sup> )         | 2852                                        | <b>-0.04</b> (-0.05;-0.02) | 2853                              | <b>-0.02</b> (-0.03;-0.01) |

Bold: estimate is statistically significant at the 0.05 level

<sup>a</sup> N=number of observations. Individuals may be included in the analyses several times since they could experience multiple deteriorations in working conditions and healthy behaviour during follow-up.
